# Supplementary material
Source: MDPI journal article supplement (https://www.mdpi.com/2071-1050/5/5/1960)
Supplement: s1 [file s1]

**Appendix 1.** Carbon dioxide and GHG emissions values; ecological footprint values; life cycle assessment data sources.

| Material        | kgCO <sub>2</sub> /t | kgCO <sub>2</sub> /t | Energy land gha/t | Forest/cropland gha/t | EF gha/t    | References                                                                                                                                                                                                                                                                                   |
|-----------------|----------------------|----------------------|-------------------|-----------------------|-------------|----------------------------------------------------------------------------------------------------------------------------------------------------------------------------------------------------------------------------------------------------------------------------------------------|
| <b>GLASS</b>    |                      |                      |                   |                       |             |                                                                                                                                                                                                                                                                                              |
|                 |                      | 791                  | 0.18              | ---                   | <b>0.18</b> | FEVE European Container Glass Federation, 2012. Life cycle inventory—data availability.<br><a href="http://www.feve.org/index.php?option=com_content&amp;view=article&amp;id=79&amp;Itemid=18">http://www.feve.org/index.php?option=com_content&amp;view=article&amp;id=79&amp;Itemid=18</a> |
|                 |                      | 843;<br>823          | 0.19              | ---                   | <b>0.19</b> | Hischier, R. 2007. Life Cycle Inventories of Packaging and Graphical Papers. ecoinvent-Report No. 11, Swiss Centre for Life Cycle Inventories, Dübendorf CH.                                                                                                                                 |
|                 |                      | 900                  | 0.20              | ---                   | <b>0.20</b> | Hekkert, M., Joosten, L., Worrell, E. and Turkenburg, C. 2000. Reduction of CO <sub>2</sub> emissions by improved management of material and product use: the case of primary packaging. <i>Resource, Conservation and Recycling</i> 29: 33–64.                                              |
|                 |                      | 1,250                | 0.28              | ---                   | <b>0.28</b> | PE Americas, 2010. Environmental Overview. Complete life cycle assessment of North American container glass. Glass Packaging Institute.                                                                                                                                                      |
|                 |                      | 1,795                | 0.40              | ---                   | <b>0.40</b> | Edwards, D. and Shelling, J. 1999. Municipal Waste Life Cycle Assessment Part 2: Transport Analysis and Glass Case Study. <i>Transactions of the Institution of Chemical Engineers</i> 77 Part B September: 259–274.                                                                         |
|                 | 600                  |                      |                   |                       |             | Humbert, S. Rossi V. Margni M. Jolliet O. and Loerincik Y. 2009. Life Cycle assessment of two babyfood jars vs. plastic pots. <i>International Journal of Life Cycle Assessment</i> 14, 95–106.                                                                                              |
|                 | 940                  |                      |                   |                       |             | Liu, X., Fu, Y., Xu, W. & Meng, L. 2011. Research on the carbon footprint of glass beverage packaging vessel. <i>Journal of Beijing Institute of Graphic Communication</i> , 19 (4), 23–25.                                                                                                  |
| <b>ALUMINUM</b> |                      |                      |                   |                       |             |                                                                                                                                                                                                                                                                                              |
|                 |                      | 7,900                | 1.77              | ---                   | <b>1.77</b> | PE Americas, 2010. Final Report—Life Cycle Impact Assessment of Aluminum Beverage Cans prepared for Aluminum Association, Inc. Washington, D.C.                                                                                                                                              |
|                 |                      | 8,570                | 1.91              | ---                   | <b>1.91</b> | Leroy, C. 2009. Provision of LCI data in the European Aluminum industry Methods and examples. <i>International Journal of Life Cycle Assessment</i> 14 (Supplement 1), S10–S44.                                                                                                              |

## Appendix 1. Cont.

| Material     | kgCO <sub>2</sub> /t | kgCO <sub>2</sub> /t | Energy land gha/t | Forest/cropland gha/t | EF gha/t    | References                                                                                                                                                                                                                                        |
|--------------|----------------------|----------------------|-------------------|-----------------------|-------------|---------------------------------------------------------------------------------------------------------------------------------------------------------------------------------------------------------------------------------------------------|
|              |                      | 9,530                | 2.13              | ---                   | <b>2.13</b> | Althaus H., Blaser S., Classen M., and Jungbluth N. 2007. Life Cycle Inventories of Metals. Final report eco-invent 2000. Dubendorf CH: Swiss Centre for LCI, EMPA-DU.                                                                            |
|              |                      | 12,000               | 2.68              | ---                   | <b>2.68</b> | Choate, W. and Green, J. 2004. Modeling the Impact of Secondary Recovery (Recycling) on U.S. Aluminum Supply and Nominal Energy Requirements, <i>Light Metals 2004</i> , 913–918. The Minerals, Metals and Materials Society.                     |
|              | 21,562               | 18,184               | 4.06              | ---                   | <b>4.06</b> | Gao, F. Nie, Z., Wang, Z., Li H., Gong., and Zuo, T. 2009. Greenhouse gas emissions and reduction potential of primary aluminum production in China. <i>Science in China Series E: Technological Sciences</i> 52, (8) 2161–2166.                  |
|              | 9,800                |                      |                   |                       |             | International Aluminum Institute, 2007. Life cycle assessment of aluminum: Inventory data for the primary aluminum industry. Year 2005 update.                                                                                                    |
| <b>STEEL</b> |                      |                      |                   |                       |             |                                                                                                                                                                                                                                                   |
|              |                      | 1700                 | 0.38              | ---                   | <b>0.38</b> | Steiner, R. and Frischknecht R. 2007. Life Cycle inventories of Metal Processing and Compressed Air Supply. Final report ecoinvent Data v2.0 Dubendorf and Uster, CH.                                                                             |
|              |                      | 1720                 | 0.38              | ---                   | <b>0.38</b> | Emi, T. and Min, D. 2005. Strategies and achievements for moving towards minimum wastes and emissions in Asian Steel Industry. <i>Ironmaking and Steelmaking</i> 32(3) 242–250.                                                                   |
|              |                      | 1840; 2469           | 0.54              | ---                   | <b>0.54</b> | Bushi, L., Young, S., and Meil, J. 2003. ATHENA for US Life Cycle Database. ATHENA Sustainable Materials Institute.                                                                                                                               |
|              |                      | 2100                 | 0.47              | ---                   | <b>0.47</b> | Yellishety, M. Mudd, G., Ranjith, P. and Tharumarajah, A. 2011. Environmental life-cycle comparisons of steel production and recycling: sustainability issues, problems and prospects. <i>Environmental Science and Policy</i> —article in press. |
|              |                      | 2290                 | 0.51              | ---                   | <b>0.51</b> | Steiner, R. and Frischknecht R. 2007. Life Cycle inventories of Metal Processing and Compressed Air Supply. Final report ecoinvent Data v2.0 Dubendorf and Uster, CH.                                                                             |
|              |                      | 2520                 | 0.56              | ---                   | <b>0.56</b> | Hekkert, M., Joosten, L., Worrell, E. and Turkenburg, C. 2000. Reduction of CO <sub>2</sub> emissions by improved management of material and product use: the case of primary packaging. <i>Resource, Conservation and Recycling</i> 29: 33–64.   |

## Appendix 1. Cont.

| Material             | kgCO <sub>2</sub> /t | kgCO <sub>2</sub> /t                            | Energy land gha/t | Forest/cropland gha/t | EF gha/t    | References                                                                                                                                                                                                                                                                                                                  |
|----------------------|----------------------|-------------------------------------------------|-------------------|-----------------------|-------------|-----------------------------------------------------------------------------------------------------------------------------------------------------------------------------------------------------------------------------------------------------------------------------------------------------------------------------|
|                      |                      | 3490;<br>4025                                   | 0.78              | ---                   | <b>0.78</b> | World Steel Association, 2010. World Stainless Steel LCI. Contact World Steel Association for data.                                                                                                                                                                                                                         |
|                      |                      | 2850;<br>3570                                   | 0.64              | ---                   | <b>0.64</b> | European Confederation of Iron and Steel Industries, 2010. Annual Report. Accessed at <a href="http://www.eurofer.eu">www.eurofer.eu</a> .                                                                                                                                                                                  |
|                      |                      | 2600;<br>3500                                   | 0.78              | ---                   | <b>0.78</b> | Huang, Z., Ding, X., Hao, S. and Liu, S. 2010. Identification of main influencing factors of life cycle CO <sub>2</sub> emissions from the integrated steelworks using sensitivity analysis. <i>Journal of Cleaner Production</i> 18, 1052–1058.                                                                            |
|                      |                      | 3600                                            | 0.80              | ---                   | <b>0.80</b> | Johnson, J., Reck, B., Wang, T. and Graedel, T. 2008. The energy benefit of stainless steel recycling. <i>Energy Policy</i> 36, 181–192.                                                                                                                                                                                    |
|                      | 1600;<br>2000        |                                                 |                   |                       |             | World Steel Association, 2011. Life cycle assessment methodology report. ISBN 978-2-930069-66-1. World Steel Association: Brussels, Belgium.                                                                                                                                                                                |
|                      | 2010                 |                                                 |                   |                       |             | American Iron and Steel Institute, 2012. Accessed at <a href="http://www.steel.org/en/Sustainability/Life%20Cycle%20Information.aspx">http://www.steel.org/en/Sustainability/Life%20Cycle%20Information.aspx</a> . Data from World Steel Association, World Steel Association Life Cycle Assessment Global Hot Rolled Coil. |
|                      | 2300                 |                                                 |                   |                       |             | Norgate, T., Jahanshahi, S. and Rankin, W. 2007. Assessing the environmental impact of metal production processes. <i>Journal of Cleaner Production</i> 15, 838–848.                                                                                                                                                        |
| <b>PAPER</b>         |                      |                                                 |                   |                       |             |                                                                                                                                                                                                                                                                                                                             |
| <b>Graphic paper</b> |                      | 420                                             | 0.09              | 2.53                  | <b>2.62</b> | SCA Ortviken, 2011. Carbon Profile GrahpoCote, GraphoLux, GraphoMatt. SCA Ortviken: Sundsvall, Sweden.                                                                                                                                                                                                                      |
|                      |                      | 500                                             | 0.11              | 2.53                  | <b>2.64</b> | Demharter, W. 2011. ERA Conference Presentation. “Carbon Dioxide balance of print products—view of the industry.”                                                                                                                                                                                                           |
|                      |                      | 763;<br>772;<br>1012;<br>1031;<br>1315;<br>1457 | 0.17              | 2.53                  | <b>2.70</b> | Hischier, R. 2007. Life Cycle Inventories of Packaging and Graphical Papers. ecoinvent-Report No. 11, Swiss Centre for Life Cycle Inventories, Dubendorf CH                                                                                                                                                                 |

## Appendix 1. Cont.

| Material         | kgCO <sub>2</sub> /t | kgCO <sub>2</sub> /t | Energy land gha/t | Forest/cropland gha/t | EF gha/t                   | References                                                                                                                                                                                                                                                                                                                                                                                                              |
|------------------|----------------------|----------------------|-------------------|-----------------------|----------------------------|-------------------------------------------------------------------------------------------------------------------------------------------------------------------------------------------------------------------------------------------------------------------------------------------------------------------------------------------------------------------------------------------------------------------------|
|                  | 1200                 | 1200                 | 0.27              | 2.53                  | <b>2.80</b>                | Dias A., Arroja, L., and Capela, I. 2007. Life Cycle Assessment of Printing and Writing Paper Produced in Portugal. <i>International Journal of Life Cycle Assessment</i> 12 (7) 521–528.                                                                                                                                                                                                                               |
|                  |                      | 1410;<br>2478        | 0.32<br>0.55      | 2.53<br>2.53          | <b>2.85</b><br><b>3.08</b> | Newell, J. and Vos, R. 2011. Papering over space and place: Product carbon footprint modeling in the global paper industry. <i>Annals of the Association of American Geographers</i> 101 (4), 730–741.                                                                                                                                                                                                                  |
|                  |                      | 3117                 | 0.70              | 2.53                  | <b>3.08</b>                | Yan, Y. 2011. Life cycle assessment and analysis of disposable plastic cups and paper cups. <i>Environmental Science and Management</i> , 36 (6), 174–179.                                                                                                                                                                                                                                                              |
|                  | 2200                 |                      |                   |                       |                            | Pickin, J.G., Yuen, S.T.S. and Hennings, H. 2002. Waste Management options to reduce greenhouse gas emissions from paper in Australia, “ <i>Atmospheric Environment</i> 26, 741–752.                                                                                                                                                                                                                                    |
|                  | 1100                 |                      |                   |                       |                            | Suzano Pulp and Paper, 2011. Sustainability Report 2010. Suzano Pulp and Paper: Sao Paulo, Brazil.                                                                                                                                                                                                                                                                                                                      |
|                  | 520                  |                      |                   |                       |                            | Domtar, 2009. Sustainability, Environmental Responsibility, Climate Change, Table: Pulp and Paper Mills GHG Intensity Trends 2002 to 2009. <a href="http://www.domtar.com/en/sustainability/8856.asp">www.domtar.com/en/sustainability/8856.asp</a> .                                                                                                                                                                   |
| <b>Newsprint</b> | 1071;                | 784;<br>955;<br>1232 | 0.18              | 1.97                  | <b>2.15</b>                | Hischier, R. 2007. Life Cycle Inventories of Packaging and Graphical Papers. ecoinvent-Report No. 11, Swiss Centre for Life Cycle Inventories, Dübendorf CH.                                                                                                                                                                                                                                                            |
|                  |                      | 833                  | 0.19              | 1.97                  | <b>2.16</b>                | Ekvall, T. 1999. Key Methodological issues for life cycle inventory analysis of paper recycling. <i>Journal of Cleaner Production</i> 7, 281–294. Data in this paper is from a paper published in Swedish: Bauman, H. Ekvall T, Eriksson E. Kullman M. Rydberg T. Ryding A. Svensson G, Steen B. Miljömassiga skillnader mellan återvinning/återanvändning och förbränning/deponering. FOU No. 79 Malmö: REFORSK, 1993. |
|                  |                      | 1580                 | 0.35              | 1.97                  | <b>2.32</b>                | Norske Skog, 2009. Norske Skog Australasia Newsprint Sustainability. Publishers National Environment Bureau.                                                                                                                                                                                                                                                                                                            |
|                  |                      | 1667                 | 0.37              | 1.97                  | <b>2.34</b>                | Chen, S., Ren, L., Liu, Z., Zhou, C., Yue, W., and Zhang, J. 2011. Life cycle assessment and type III environmental declarations for newsprint in China. <i>Acta Scientiae Circumstantiae</i> , 31, (6) 1331–1337.                                                                                                                                                                                                      |

## Appendix 1. Cont.

| Material                      | kgCO <sub>2</sub> /t | kgCO <sub>2</sub> /t | Energy land gha/t | Forest/cropland gha/t | EF gha/t    | References                                                                                                                                                                                                                                                                                                                                                                                   |
|-------------------------------|----------------------|----------------------|-------------------|-----------------------|-------------|----------------------------------------------------------------------------------------------------------------------------------------------------------------------------------------------------------------------------------------------------------------------------------------------------------------------------------------------------------------------------------------------|
|                               | 800                  |                      |                   |                       |             | Laurijssen, J., Marsidi, M., Westenbroek, A., Worrell, E. and Faaij, A. 2010 in press. Paper and biomass for energy? The impact of paper recycling on energy and CO <sub>2</sub> emissions. <i>Resources, Conservation and Recycling</i> 54(12):1208–1218.                                                                                                                                   |
| <b>Cardboard and Boxboard</b> | 660; 967; 1082       | 615, 889, 998        | 0.14              | 2.57                  | <b>2.71</b> | Hischier, R. 2007. Life Cycle Inventories of Packaging and Graphical Papers. ecoinvent-Report No. 11, Swiss Centre for Life Cycle Inventories, Dubendorf CH.                                                                                                                                                                                                                                 |
|                               | 560; 1620            |                      |                   |                       |             | Norske Skog, 2010. Norske Skog 2010 Annual Report.                                                                                                                                                                                                                                                                                                                                           |
|                               | 580                  |                      |                   |                       |             | PE-Americas and Five Winds International, 2010. Corrugate Packaging Life-Cycle Assessment Summary Report. Prepared for Corrugated Packaging Alliance: Fibre Box Association, American Forest and Paper Association, Association of Independent Corrugated Converters.                                                                                                                        |
|                               | 788                  |                      |                   |                       |             | Ongmongkolkul A., Nielsen P.H., and Mousa, M.N., 2002. Life Cycle Assessment of Paperboard Packaging Produced in Thailand. First National Environmental Conference, Environmental Engineering Association of Thailand (EEAT). Chiang Mai, January 2002. pp. 330–339.                                                                                                                         |
|                               | 750                  |                      |                   |                       |             | Ross, S. and Evans, D. 2002. Use of life cycle assessment in environmental management. <i>Environmental Management</i> 29 (1) 132–142.                                                                                                                                                                                                                                                       |
| <b>PLASTICS</b>               |                      |                      |                   |                       |             |                                                                                                                                                                                                                                                                                                                                                                                              |
| <b>PET</b>                    | n/a                  | 1890; 1950           | 0.44              | ---                   | <b>0.44</b> | Hekkert, M., Joosten, L., Worrell, E. and Turkenburg, C. 2000. Reduction of CO <sub>2</sub> emissions by improved management of material and product use: the case of primary packaging. <i>Resource, Conservation and Recycling</i> 29: 33–64.                                                                                                                                              |
|                               | 1447                 | 1072                 | 0.24              | ---                   | <b>0.24</b> | Franklin Associates, 2010. Final Report—Life Cycle inventory of 100% Postconsumer HDPE and PET recycled from postconsumer containers and packaging. Prepared for The Plastics Division of the American Chemistry Council Inc., the Association of Postconsumer Plastic Recyclers (APR), the National Association for PET Container Resources (NAPCOR) and the PET Resin Association (PETRA). |

## Appendix 1. Cont.

| Material    | kgCO <sub>2</sub> /t | kgCO <sub>2</sub> /t | Energy land gha/t | Forest/cropland gha/t | EF gha/t    | References                                                                                                                                                                                                                               |
|-------------|----------------------|----------------------|-------------------|-----------------------|-------------|------------------------------------------------------------------------------------------------------------------------------------------------------------------------------------------------------------------------------------------|
|             | 2897                 | 2377                 | 0.53              | ---                   | <b>0.53</b> | Hischier, R. 2007. Life Cycle Inventories of Packaging and Graphical Papers. ecoinvent-Report No. 11, Swiss Centre for Life Cycle Inventories, Dubendorf CH.                                                                             |
|             | 2785                 | 2000                 | 0.58              | ---                   | <b>0.58</b> | PlasticsEurope, 2011. Eco-Profiles and environmental product declarations of the European Plastics Manufacturers. Polyethylene Terephthalate (PET) bottle grade. Plastics Europe: Brussels, Belgium.                                     |
|             | 2660                 |                      |                   |                       |             | Franklin Associates, 2011. Cradle to Gate Life Cycle Inventory of Nine Plastics Resins and Four Polyurethane Precursors. Prepared for the Plastics Division of the American Chemistry Council.                                           |
| <b>PVC</b>  |                      | 1410                 | 0.31              | ---                   | <b>0.31</b> | Chen, X., Xi, F., Geng, Y. and Fujita, T. 2011. The potential environmental gains from recycling waste plastics: Simulation of transferring recycling and recovery technologies to Shenyang, China. <i>Waste Management</i> 31, 168–179. |
|             | 2140                 | 1815                 | 0.41              | ---                   | <b>0.41</b> | Franklin Associates, 2011. Cradle to Gate Life Cycle Inventory of Nine Plastics Resins and Four Polyurethane Precursors. Prepared for the Plastics Division of the American Chemistry Council.                                           |
|             |                      | 1800                 | 0.40              | ---                   | <b>0.40</b> | Ostermayer, A. and Giegrich, J. 2006. Eco-profiles of the European Plastics Industry, Polyvinylchloride (PVC) Suspension Polymerisation. Prepared for The European Council of Vinyl Manufacturers and PlasticsEurope.                    |
|             | 1,800                |                      |                   |                       |             | Hischier, R. 2007. Life Cycle Inventories of Packaging and Graphical Papers. ecoinvent-Report No. 11, Swiss Centre for Life Cycle Inventories, Dubendorf CH.                                                                             |
|             | 1765                 |                      |                   |                       |             | Tian, B., Xu, X., Fu, H. & Wang, S. 2012. Assessment and accounting the product carbon footprint based on the life cycle. <i>Chinese Journal of Environmental Management</i> , 1, 21–26.                                                 |
| Polystyrene | 3383                 | 2745                 | 0.58              | ---                   | <b>0.58</b> | Hischier, R. 2007. Life Cycle Inventories of Packaging and Graphical Papers. ecoinvent-Report No. 11, Swiss Centre for Life Cycle Inventories, Dubendorf CH.                                                                             |
|             | n/a                  | 3385                 | 0.76              | ---                   | <b>0.76</b> | Chen, X., Xi, F., Geng, Y. and Fujita, T. 2011. The potential environmental gains from recycling waste plastics: Simulation of transferring recycling and recovery technologies to Shenyang, China. <i>Waste Management</i> 31, 168–179. |
|             |                      |                      |                   |                       |             |                                                                                                                                                                                                                                          |

## Appendix 1. Cont.

| Material        | kgCO <sub>2</sub> /t | kgCO <sub>2</sub> /t | Energy land gha/t | Forest/cropland gha/t | EF gha/t    | References                                                                                                                                                                                                                                                                                                                                                                                   |
|-----------------|----------------------|----------------------|-------------------|-----------------------|-------------|----------------------------------------------------------------------------------------------------------------------------------------------------------------------------------------------------------------------------------------------------------------------------------------------------------------------------------------------------------------------------------------------|
| PE film         | n/a                  | 3143                 | 0.70              | ---                   | <b>0.70</b> | Chen, X., Xi, F., Geng, Y. and Fujita, T. 2011. The potential environmental gains from recycling waste plastics: Simulation of transferring recycling and recovery technologies to Shenyang, China. <i>Waste Management</i> 31, 168–179.                                                                                                                                                     |
|                 | 4660                 |                      |                   |                       |             | Ross, S. and Evans, D. 2002. Use of life cycle assessment in environmental management. <i>Environmental Management</i> 29 (1) 132–142.                                                                                                                                                                                                                                                       |
|                 | 1950                 |                      |                   |                       |             | James, K. and Grant, T. 2005. LCA of degradable plastic bags. Centre for Design at RMIT (Royal Melbourne Institute of Technology) University, Melbourne Australia.                                                                                                                                                                                                                           |
| PE Plastic Bag  | n/a                  | 4102                 | 0.92              | ---                   | <b>0.92</b> | Lv, Y., Huang, F., Qiu, Y. & Wang, L. 2002. Environmental impact evaluation of plastic and wooden products with LCA. <i>Environmental Pollution and Control</i> , 24 (6), 382–384.                                                                                                                                                                                                           |
| HDPE            | 1814                 | 1,370                | 0.31              | ---                   | <b>0.31</b> | Franklin Associates, 2011. Cradle to Gate Life Cycle Inventory of Nine Plastics Resins and Four Polyurethane Precursors. Prepared for the Plastics Division of the American Chemistry Council.                                                                                                                                                                                               |
|                 | n/a                  | 650; 510             | 0.15              | ---                   | <b>0.15</b> | Hekkert, M., Joosten, L., Worrell, E. and Turkenburg, C. 2000. Reduction of CO <sub>2</sub> emissions by improved management of material and product use: the case of primary packaging. <i>Resource, Conservation and Recycling</i> 29: 33–64.                                                                                                                                              |
|                 |                      | 581                  | 0.13              | ---                   | <b>0.13</b> | Franklin Associates, 2010                                                                                                                                                                                                                                                                                                                                                                    |
|                 | 1950                 |                      |                   |                       |             | Hischier, R. 2007. Life Cycle Inventories of Packaging and Graphical Papers. ecoinvent-Report No. 11, Swiss Centre for Life Cycle Inventories, Dubendorf CH.                                                                                                                                                                                                                                 |
| LDPE            | 2100                 | n/a                  | 0.38              | ---                   | <b>0.38</b> | Boustead, I. 2005                                                                                                                                                                                                                                                                                                                                                                            |
|                 | 2100                 | n/a                  | 0.38              | ---                   | <b>0.38</b> | Hischier, R. 2007. Life Cycle Inventories of Packaging and Graphical Papers. ecoinvent-Report No. 11, Swiss Centre for Life Cycle Inventories, Dubendorf CH.                                                                                                                                                                                                                                 |
|                 | 1870                 | n/a                  | 0.32              | ---                   | <b>0.32</b> | Franklin Associates, 2010. Final Report—Life Cycle inventory of 100% Postconsumer HDPE and PET recycled from postconsumer containers and packaging. Prepared for The Plastics Division of the American Chemistry Council Inc., the Association of Postconsumer Plastic Recyclers (APR), the National Association for PET Container Resources (NAPCOR) and the PET Resin Association (PETRA). |
|                 | 2650                 | n/a                  | 0.59              | ---                   | <b>0.59</b> | James, K. and Grant, T. 2005. LCA of degradable plastic bags. Centre for Design at RMIT (Royal Melbourne Institute of Technology) University, Melbourne Australia.                                                                                                                                                                                                                           |
| <b>TEXTILES</b> |                      |                      |                   |                       |             |                                                                                                                                                                                                                                                                                                                                                                                              |
| Cotton          | n/a                  | 15, 570              | 3.48              | 5.5                   | <b>8.98</b> | Grace, P., Gane, M., and Navarro Garcia, F. (2009) Life Cycle Assessment of a 100%Australian cotton t-shirt. Queensland University of Technology.                                                                                                                                                                                                                                            |

## Appendix 1. Cont.

| Material       | kgCO <sub>2</sub> /t | kgCO <sub>2</sub> /t | Energy land gha/t | Forest/cropland gha/t | EF gha/t     | References                                                                                                                                                                                                                                                                                                                                                                                       |
|----------------|----------------------|----------------------|-------------------|-----------------------|--------------|--------------------------------------------------------------------------------------------------------------------------------------------------------------------------------------------------------------------------------------------------------------------------------------------------------------------------------------------------------------------------------------------------|
|                | n/a                  | 12,760               | 2.85              | 5.5                   | <b>8.35</b>  | Steinberger, J., Friot, D., Joliet, O. and Erkman, S. 2009. A spatially explicit life cycle inventory of the global textile chain. <i>International Journal of Life Cycle Assessment</i> 14, 443–455.                                                                                                                                                                                            |
|                | n/a                  | 15000;<br>16000      | 3.35              | 5.5                   | <b>9.07</b>  | Levi Strauss and Company, 2010. Levi Strauss and Company life cycle approach to examine the environmental performance of its products. Accessed at <a href="http://levistrauss.com/sites/levistrauss.com/files/librarydocument/2012/6/e-evaluate-web-content-2012-05-23.pdf">http://levistrauss.com/sites/levistrauss.com/files/librarydocument/2012/6/e-evaluate-web-content-2012-05-23.pdf</a> |
|                | 27092                | 22042                | 6.05              | 5.5                   | <b>11.55</b> | Althaus, H.J., Dinkel F., Werner, F. 2007. Life Cycle Inventories of Renewable Materials. Ecoinvent Swiss Centre for Life Cycle Inventories, Dubendorf CH                                                                                                                                                                                                                                        |
|                | 25,000               |                      |                   |                       |              | Pyke, B. 2009. The Impacts of Carbon Trading on the Cotton Industry Cotton R&D Corporation of Australia. PP Presentation, 6 <sup>th</sup> ICAC Plenary.                                                                                                                                                                                                                                          |
| <b>DIAPERS</b> | n/a                  | 2600                 | 0.58              | 0.36                  | <b>0.94</b>  | Hakala, S., Virtanen, Y., Meinander, K. and Tanner, T. 1997. Life-cycle assessment, comparison of biopolymer and traditional diaper systems. ISSN 1235-0605. Technical Research Centre of Finland.                                                                                                                                                                                               |
|                | n/a                  | 4390                 | 0.98              | 0.36                  | <b>1.34</b>  | Aumonier, S. and Collins, M. 2005. Life cycle assessment of disposable and reusable nappies in the UK. Environment Agency: Bristol, UK.                                                                                                                                                                                                                                                          |
|                | 3754                 |                      |                   |                       |              | Aumonier, S., Collins, M. And Garrett, P. 2008. An updated lifecycle assessment study for disposable and reusable nappies. SC10018/SR2. Environment Agency: Bristol UK.                                                                                                                                                                                                                          |
